# Supplementary material for: Non-Persistence and Non-Adherence of Patients with Type 2 Diabetes Mellitus in Therapy with GLP-1 Receptor Agonists: A Retrospective Analysis
Source: Springer Nature journal article supplement (doi:10.1007/s13300-015-0149-4), 2015-12-22
Supplement: MOESM1 [file 9263412]

## *Why carry out this study?*

- Therapy with Glucagon-like peptide-1 (GLP-1) receptor agonists is a relatively new therapy option in type-2 diabetes (T2DM).
- However, its effectiveness depends on treatment persistence/adherence in real-life care - data about treatment persistence/adherence related to GLP-1 receptor agonist therapy are hardly known yet .
- The study assessed the degrees of treatment persistence/adherence related to GLP-1 receptor agonist therapy in both UK and Germany.

## *What was learned from the study?*

- Percentage of T2DM patients discontinuing GLP-1 receptor agonist therapy after 12 months was 29.5-36.4%; percentage of patients being classified as non-adherent during general continuation of GLP-1 receptor agonist therapy was around 20%.
- The degree of non-persistence and non-adherence to GLP-1 receptor agonist therapy is similar to that reported for other antidiabetic treatments.
- In our study, a once-daily regimen, compared with a twice-daily regimen, was associated with a higher degree of persistence.

This summary slide represents the opinions of the authors. Sponsorship for this study was funded by Glaxo SmithKline. For a full list of acknowledgments and disclosures for all authors of this article, please see the full text online. © The Author(s) 2015. Creative Commons Attribution Noncommercial License (CC BY-NC).
